# Supplementary material for: Oncogenic Mutations Differentially Affect Bax Monomer, Dimer, and Oligomeric Pore Formation in the Membrane
Source: PubMed Central journal article supplement (PMC5024136; doi:10.1038/srep33340), 2016-09-15
Supplement: srep33340-s1.pdf [file srep33340-s1.pdf]

# Supplementary information

## Oncogenic Mutations Affect Bax Monomer, Dimer, and Pore in Membrane Differentially

Mingzhen Zhang<sup>1</sup>, Jie Zheng<sup>1</sup>, Ruth Nussinov<sup>2,3\*</sup> and Buyong Ma<sup>2\*</sup>

<sup>1</sup> Department of Chemical & Biomolecular Engineering, the University of Akron, Akron, Ohio 44325

<sup>2</sup> Basic Science Program, Basic Science Program, Leidos Biomedical Research, Inc. Cancer and Inflammation Program, National Cancer Institute, Frederick, MD 21702, USA

<sup>3</sup> Sackler Inst. of Molecular Medicine, Department of Human Genetics and Molecular Medicine, Sackler School of Medicine, Tel Aviv University, Tel Aviv 69978, Israel

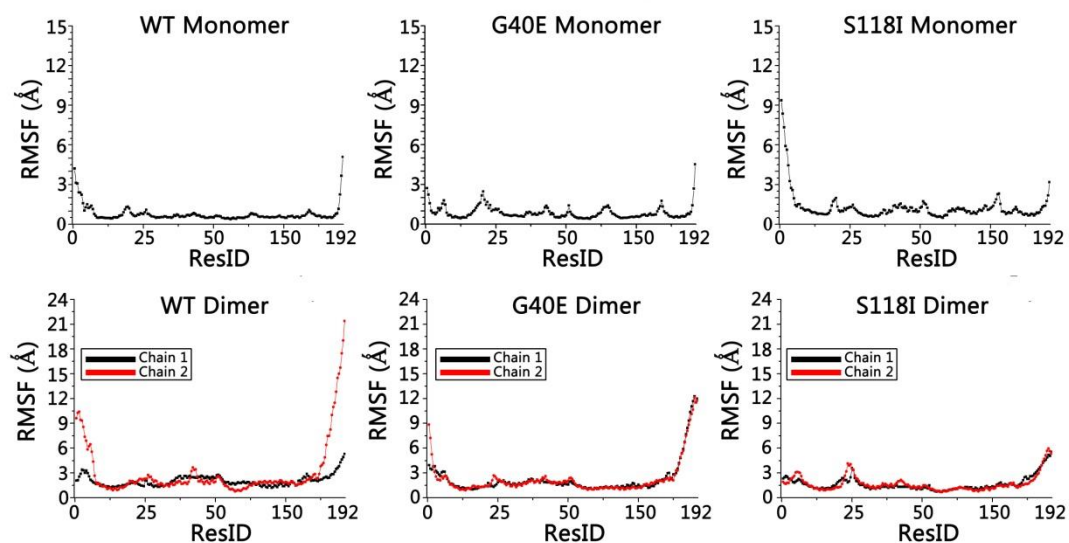

Figure S1. Residue-based backbone RMSF profiles for wild-type, G40E and S118 monomers and dimers. WT denotes the wild type.

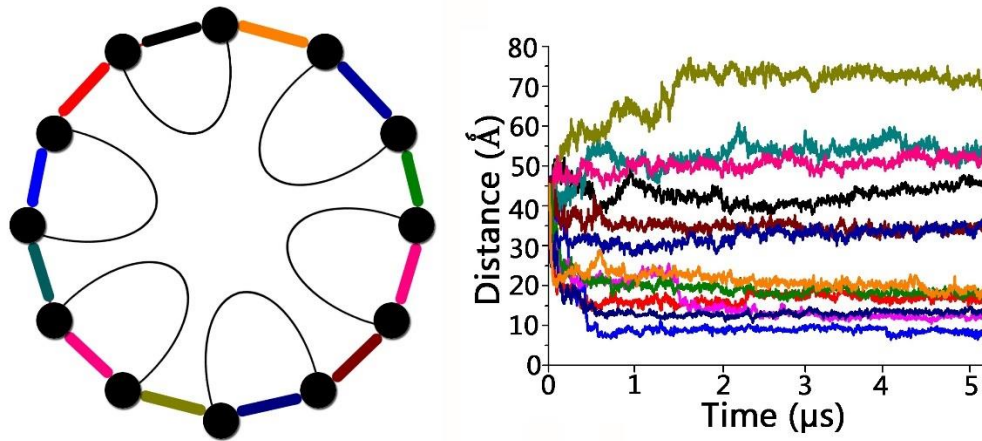

Figure S2. Dimerization of Bax  $\alpha 9$  during pore formation simulation. The Bax  $\alpha 9$  was initially inserted into the membrane without contact, unlike the dimeric conformation in other Bax segments. However, the  $\alpha 9$  spontaneously dimerize, increasing the overall stability of the Bax pore. The plot reports the distances between the centers of mass for the different Bax  $\alpha 9$  units.

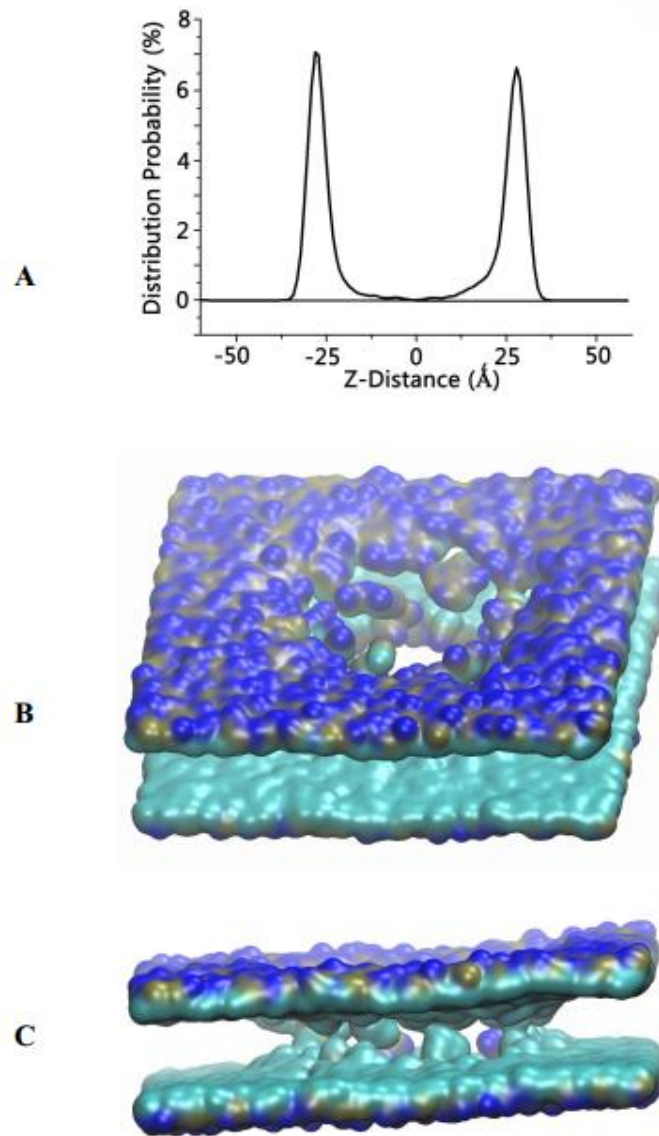

Figure S3. Bax docecamer forms toroidal pore in membrane after 1.5  $\mu$ s simulation. (A) Distribution of lipid head group perpendicular to the membrane. (B) and (C) Top and side view of lipid head groups of membrane portion of the pore.

Table S1. GMBV energies for the simulated systems.

|           | $E_{\text{monomer}}$ (kcal/mol) | $E_{\text{dimer}}$ (kcal/mol) | $\Delta E$ (kcal/mol) |
|-----------|---------------------------------|-------------------------------|-----------------------|
| Wild Type | -6233.72                        | -12425.60                     | 41.84                 |
| G40E      | -6209.00                        | -12454.00                     | -36.00                |
| S118I     | -6165.67                        | -12464.40                     | -133.06               |
